# Supplementary material for: Sound production in the Meagre, Argyrosomus regius (Asso, 1801): intraspecific variability associated with size, sex and context
Source: PeerJ. 2020 Feb 24;8:e8559. doi: 10.7717/peerj.8559 (PMC7045892; doi:10.7717/peerj.8559)
Supplement: File S7 — Raw Data: analysed sounds produced by juvenile meagre in disturbance and voluntary contexts [file peerj-08-8559-s007.xlsx]

## Sheet: Social Captivity
Tank	Sound Duration (ms)	Nº of pulses	Pulse period	Peak frequency	Q1 Freq	Q3 Freq	Max Freq	Freq 95%	IQR BW	Freq 5%	Center Freq
J13	187	13	15	293	281	434	293	504	164	164	363
J13	398	25	16.2917	498	258	445	504	504	199	82	375		To study ontogenetic variation of sounds made during social context in captivity a total of 100 sounds were analysed (50 for juveniles and 50 for adults)
J13	164	12	14.3636	498	316	469	492	516	152	129	410
J13	295	19	15.9444	393	246	434	398	504	188	93	340
J13	336	22	15.7619	393	281	445	445	504	164	106	375
J13	154	12	13.4545	404	316	469	481	504	152	152	398
J13	122	10	12.7778	475	234	434	316	481	199	82	328
J13	109	9	12.75	481	305	445	481	492	141	176	387
J13	108	9	12.5	410	281	422	246	492	141	211	363
J13	83	7	12.6667	352	293	434	434	516	141	176	352
J14	197	13	15.75	468	234	445	469	481	211	129	340
J15	199	13	15.8333	510	211	434	211	516	223	117	305
J16	252	17	15.25	392	270	410	387	481	141	152	340
J17	125	9	14.75	439	281	457	434	516	176	141	375
J18	153	12	13.2727	398	281	445	398	54	164	176	375
J20	166	13	13.25	223	223	387	223	492	164	141	293
J21	108	9	12.5	498	305	445	445	504	141	176	398
J22	198	14	14.5385	369	293	445	375	516	152	152	375
J23	209	13	16.6667	445	281	445	445	504	164	152	375
J24	313	20	16.1053	451	305	457	445	504	152	164	398
J24	554	35	16.0294	340	281	464	340	504	152	164	352
J25	348	23	15.4091	398	528	434	398	504	176	152	340
J26	172	12	14.9091	223	211	387	223	481	176	128	281
J27	175	11	16.6	469	328	469	457	516	141	199	410
J28	317	22	14.6667	404	234	410	410	492	176	152	328
J29	331	22	15.4286	398	281	457	398	504	176	152	387
J30	101	7	15.6667	428	352	469	422	504	117	223	422
J31	208	15	14.3571	486	293	457	410	492	164	164	387
J32	128	9	15.125	451	316	457	457	516	141	211	387
J33	290	20	14.8947	404	246	422	398	504	176	141	340
J13	136	10	14.4444	451	234	411	328	481	176	141	328
J34	144	9	17.125	457	352	469	457	516	117	188	445
J34	373	25	15.2917	498	281	457	445	504	176	152	387
J35	100	8	13.4286	433	281	445	434	516	164	141	363
J36	363	25	14.8333	346	270	422	352	492	152	164	352
J13	275	20	14.0526	340	258	434	340	504	176	94	340
J37	288	19	15.6111	322	246	422	316	504	176	152	328
J37	217	13	17.5833	486	352	481	457	516	129	188	422
J37	245	16	15.8667	475	305	457	481	504	152	164	387
J37	116	8	15.5714	468	340	469	469	516	129	199	410
J37	200	13	16.1667	451	305	457	445	516	152	199	398
J37	265	19	14.2222	340	281	422	340	504	141	164	340
J37	348	24	14.8696	410	270	422	410	492	152	141	352
J37	139	9	16.375	498	363	492	504	504	129	188	434
J37	336	22	15.5714	457	234	445	457	504	211	129	363
J37	329	20	16.8421	451	293	445	375	492	152	129	375
J37	308	20	15.7895	439	270	445	434	504	176	152	387
J37	295	19	15.4444	492	270	445	492	504	176	106	363
J37	335	21	15.8	498	281	445	492	504	164	152	375
J37	174	14	13		211	398	387	492	188	117	305

## Sheet: Distress Captivity
Tank	TL (cm)	Weight (g)	Sound Duration (ms)	Nº of pulses	Pulse period	Dominant frequency	Q1 Freq	Q3 Freq	Max Freq	Freq 95%	IQR BW	Freq 5%	Center Freq
J13	31.4	273	73	7	11.3333	375	234	586	305	867	352	35	387
J13	31.4	273	95	9	11.25	369	293	539	363	727	246	188	387
J13	31.4	273	136	12	11.7273	345	328	527	352	773	199	210	422		To examine ontogenetic variation of distress calls, sounds produced by juveniles during handlig were randomly selected and manually analysed - 20 sounds (when present) per individual for each of the 20 juveniles
J13	31.4	273	156	13	12.4167	363	281	527	363	750	246	176	375
J13	31.4	273	154	14	11.3846	264	270	457	352	680	188	176	363
J13	31.4	273	183	17	11	275	281	481	281	703	199	176	375
J13	31.4	273	183	17	11.0625	275	281	481	363	715	199	188	375
J13	31.4	273	123	11	11.8	275	281	563	281	785	281	188	387
J13	31.4	273	116	11	11.1	275	281	539	363	762	258	188	387
J13	31.4	273	144	13	11.5	357	270	492	352	750	223	176	363
J13	31.4	273	152	14	11.2308	375	293	504	375	715	211	188	387
J13	31.4	273	161	14	11.7692	352	293	574	246	809	281	164	410
J13	31.4	273	58	6	10.6	469	305	574	469	832	270	199	457
J13	31.4	273	128	11	12.1	387	316	574	469	832	258	199	457
J13	31.4	273	251	21	12.25	357	281	539	352	785	258	176	434
J13	31.4	273	95	9	11.25	281	270	469	270	715	199	176	363
J13	31.4	273	111	11	10.7	398	281	492	305	703	211	188	375
J13	31.4	273	170	14	12.6923	281	281	481	281	680	199	176	375
J13	31.4	273	38	4	11	421	315	586	410	785	270	164	422
J13	31.4	273	83	9	9.75	316	293	481	328	691	188	188	340
J13	31.4	273	45	5	10.5	340	270	539	340	785	270	152	387
J13	32.5	324	89	8	12.1429	328	316	504	328	750	186	164	410
J13	32.5	324	214	17	13	350	270	492	340	715	223	176	363
J13	32.5	324	86	9	10.25	363	281	469	363	668	188	176	363
J13	32.5	324	85	9	10.125	293	293	481	293	680	188	188	387
J13	32.5	324	123	11	11.7	240	246	481	246	727	234	70	352
J13	32.5	324	85	8	11.4286	264	270	503	258	750	234	164	398
J13	32.5	324	85	9	10	263	270	504	340	691	234	59	352
J13	32.5	324	110	10	11.6667	375	281	469	375	668	188	176	375
J13	32.5	324	96	9	11.125	421	270	481	422	691	211	47	363
J13	32.5	324	88	8	11.8571	352	270	539	352	844	270	82	398
J13	32.5	324	117	12	10.1818	293	293	481	293	680	188	188	375
J13	32.5	324	138	13	11.1667	311	270	457	305	645	188	106	363
J13	32.5	324	101	10	10.5556	393	293	481	293	668	188	59	386
J13	32.5	324	99	9	11.75	352	316	516	352	738	199	176	410
J13	32.5	324	91	8	12	404	316	504	398	738	186	188	398
J13	32.5	324	110	9	13	410	293	492	410	668	199	176	367
J13	32.5	324	113	10	12	363	281	504	363	727	223	176	375
J13	32.5	324	84	8	11.2857	353	305	539	352	762	234	164	434
J13	32.5	324	79	8	10.5714	375	281	492	293	691	211	176	375
J13	32.5	324	79	7	12	416	328	574	410	820	246	164	422
J13	32.9	335	61	6	11	398	293	527	398	762	234	70	398
J13	32.9	335	56	6	10.4	369	281	492	281	668	211	94	975
J13	32.9	335	108	10	11.3333	287	281	492	293	656	211	70	387
J13	32.9	335	84	9	10	299	293	492	293	633	199	94	387
J13	32.9	335	99	10	10.4444	381	293	469	281	645	176	176	375
J13	32.9	335	118	11	11.3	375	281	469	375	668	188	188	375
J13	32.9	335	94	9	12	199	281	516	199	703	234	117	398
J13	32.9	335	132	13	10.5833	293	281	445	293	645	164	129	340
J13	32.9	335	89	9	10.625	293	281	469	293	645	188	188	352
J13	32.9	335	142	14	10.3846	205	223	457	211	645	234	176	340
J13	32.9	335	130	13	10.4167	275	270	469	281	609	199	164	363
J13	32.9	335	96	9	11.125	275	270	469	81	668	199	23	363
J13	32.9	335	71	8	9.57143	316	293	469	316	783	176	106	340
J13	32.9	335	112	11	10.5	305	259	481	305	691	223	164	375
J13	32.9	335	62	6	11.2	269	211	469	363	727	258	35	363
J13	32.9	335	79	8	10.4286	188	234	457	316	668	223	93	340
J13	32.9	335	211	20	10.7895	287	246	457	293	633	211	106	340
J13	32.9	335	97	10	10.3333	199	199	410	199	598	211	106	305
J13	32.9	335	112	11	10.7	305	293	410	305	609	117	106	316
J13	32.9	335	113	11	10.7	299	293	410	305	609	117	106	316
J13	32.9	335	92	10	9.88889	387	211	410	199	586	199	106	305
J13	33.1	352	84	8	11.2857	434	305	563	527	785	258	23	434
J13	33.1	352	111	9	12.875	334	234	422	328	598	188	12	328
J13	33.1	352	86	8	11.4286	343	259	516	340	783	258	23	398
J13	33.1	352	45	3	18.5	428	316	62	503	926	305	35	469
J13	33.1	352	117	11	11.3	375	270	469	375	715	199	23	375
J13	33.1	352	120	11	11.5	364	259	492	352	691	234	82	352
J13	33.1	352	95	9	11.125	363	246	480	246	691	234	70	352
J13	33.1	352	100	9	11.75	346	258	457	258	656	199	82	352
J13	33.1	352	65	6	11.8	422	270	586	422	926	316	47	422
J13	33.1	352	103	10	10.8889	287	188	464	281	668	246	35	293
J13	33.1	352	75	7	11.6667	369	270	516	363	715	246	141	363
J13	33.1	352	75	7	11.5	375	293	504	375	738	211	117	387
J13	33.1	352	74	7	11.3333	275	188	469	270	691	281	82	305
J13	33.1	352	132	12	11.5455	275	246	457	270	656	211	94	328
J13	33.1	352	111	10	11.5556	381	246	434	281	633	88	94	316
J13	33.1	352	45	4	13	387	270	551	305	797	281	47	388
J13	33.1	352	79	7	12.1667	340	258	469	340	715	211	23	340
J13	33.1	352	63	7	9.83333	387	281	42	387	727	21	106	387
J13	33.1	352	111	11	10.6	275	281	457	281	645	176	176	363
J13	33.1	352	112	11	10.7	287	270	481	293	703	211	35	352
J13	33.1	372	85	8	11.2857	293	199	398	305	609	199	59	293
J13	33.1	372	130	13	10.5	188	188	375	188	539	188	82	281
J13	33.1	372	124	13	10	305	211	398	305	516	188	106	305
J13	33.1	372	91	10	9.77778	299	188	375	305	16	188	70	293
J13	33.1	372	45	5	10	475	234	469	340	656	234	94	340
J13	33.1	372	56	5	12.75	252	246	445	387	645	199	94	352
J13	33.1	372	86	9	10.125	357	188	63	199	527	176	23	258
J13	33.1	372	109	11	10.4	281	188	375	281	563	188	12	281
J13	33.1	372	15	2	10	299	270	527	293	926	258	59	387
J13	33.1	372	75	8	10.1429	275	199	375	281	539	16	94	281
J13	33.1	372	57	6	10.4	299	211	410	293	598	199	82	305
J13	33.1	372	69	7	10.8333	264	176	398	141	574	223	82	270
J13	33.1	372	59	6	10.8	275	188	375	281	598	188	82	281
J13	33.1	372	73	7	11.1667	258	199	387	363	563	188	94	293
J13	33.1	372	15	2	10	398	211	504	398	820	893	70	375
J13	33.1	372	21	3	9	287	188	422	281	645	234	23	305
J13	33.1	372	119	10	12.6667	188	188	375	188	551	188	106	281
J13	33.1	372	122	12	10.7273	193	199	410	199	527	211	106	293
J13	33.1	372	102	10	10.7778	352	199	363	352	551	164	59	293
J13	33.1	372	102	11	9.8	205	199	987	305	504	188	94	293
J13	34.5	404	105	11	10	305	234	411	305	539	176	106	305
J13	34.5	404	120	12	10.5455	287	188	387	281	563	19	23	281
J13	34.5	404	109	11	10.4	299	246	398	293	586	152	106	305
J13	34.5	404	124	12	10.8182	293	199	387	293	574	188	164	293
J13	34.5	404	86	9	10.25	316	211	410	316	609	199	70	305
J13	34.5	404	107	11	10.3	304	258	457	387	645	199	164	340
J13	34.5	404	77	7	12	299	246	481	176	668	234	164	352
J13	34.5	404	70	7	11.1667	316	234	422	316	645	188	94	316
J13	34.5	404	147	13	11.8333	275	211	410	199	586	199	106	305
J13	34.5	404	167	16	10.8667	205	199	398	211	574	199	94	293
J13	34.5	404	202	19	10.9444	182	188	422	188	598	234	94	293
J13	34.5	404	102	11	9.9	211	211	340	211	539	129	106	270
J13	34.5	404	209	20	10.7895	193	199	387	188	551	188	94	293
J13	34.5	404	132	13	10.5833	205	199	363	199	539	164	188	293
J13	34.5	404	122	12	10.6364	205	199	398	199	516	199	106	293
J13	34.5	404	137	14	10	205	199	316	211	516	117	94	211
J13	34.5	404	202	19	10.8889	193	199	387	199	539	188	94	281
J13	34.5	404	167	13	13.4167	252	176	352	164	516	176	82	258
J13	34.5	404	156	14	11.6154	193	188	293	199	457	106	94	199
J13	34.5	404	326	28	8.07407	188	164	293	188	445	130	94	199
J13	35.2	400	98	9	11.5	328	246	492	328	680	246	0	328
J13	35.2	400	162	13	12.9167	252	176	481	258	785	305	12	340
J13	35.2	400	52	5	11.75	334	223	492	328	762	270	12	340
J13	35.2	400	19	2	12	439	328	680	35	1371	352	35	504
J13	35.2	400	123	12	10.6364	281	199	457	281	645	258	23	305
J13	35.2	400	185	17	11.3125	293	270	422	293	574	152	59	328
J13	35.2	400	169	14	12.6154	357	270	422	293	574	152	59	328
J13	35.2	400	152	15	10.5714	287	199	398	293	586	199	47	305
J13	35.2	400	37	4	11	369	188	457	281	656	270	47	340
J13	35.2	400	87	9	10.25	293	281	457	293	609	176	82	375
J13	35.2	400	147	14	10.9231	293	199	410	293	586	211	82	305
J13	35.2	400	68	7	10.6667	311	211	422	398	668	211	35	316
J13	35.2	400	196	18	11.1176	328	258	445	410	645	188	82	340
J13	35.2	400	112	10	11.7778	404	234	40	398	621	176	106	328
J13	35.2	400	97	9	11.625	316	211	410	316	598	199	35	316
J13	35.2	400	31	2	18	328	281	504	328	773	223	47	387
J13	35.2	400	49	5	11.25	270	270	469	270	691	199	176	375
J13	35.2	400	124	12	10.8182	375	234	387	375	586	152	94	305
J13	35.2	400	73	8	9.85714	346	211	436	340	645	223	35	340
J13	35.2	400	51	4	13.6667	275	234	457	23	656	23	23	340
J13	35.8	4636	92	9	10.875	281	258	398	281	586	141	94	293
J13	35.8	4636	76	7	11.8333	357	234	435	234	656	199	70	340
J13	35.8	4636	133	12	11.7273	270	258	457	270	645	199	82	352
J13	35.8	4636	108	10	11.4444	270	246	434	870	598	188	94	293
J13	35.8	4636	92	9	10.875	281	188	387	281	574	199	94	293
J13	35.8	4636	97	10	10.3333	106	106	398	106	516	293	70	293
J13	35.8	4636	96	10	10.3333	404	211	398	398	527	188	94	305
J13	35.8	4636	117	10	12.3333	264	258	434	352	609	176	94	340
J13	35.8	4636	100	10	10.5556	299	199	398	305	563	199	94	305
J13	35.8	4636	75	8	10.1429	287	211	398	293	598	188	94	293
J13	35.8	4636	75	8	10.1429	304	164	410	305	609	246	35	305
J13	35.8	4636	45	4	13.3333	316	246	492	316	703	246	47	375
J13	35.8	4636	110	11	10.6	393	199	398	398	598	199	35	305
J13	35.8	4636	162	14	12.0769	287	199	398	188	586	199	94	293
J13	35.8	4636	120	11	11.5	182	186	434	188	621	246	94	281
J13	35.8	4636	143	13	11.3333	188	199	398	188	598	199	94	293
J13	35.8	4636	144	13	11.6667	182	199	422	176	609	223	94	316
J13	35.8	4636	90	9	10.625	193	199	387	293	574	188	94	293
J13	35.8	4636	85	8	11.5714	182	199	410	199	609	211	94	293
J13	35.8	4636	85	8	11.4286	193	188	422	188	609	234	94	293
J13	38.3	591	127	15	8.78571	293	211	398	293	598	188	188	293
J13	38.3	591	67	7	10.5	293	258	445	281	727	188	164	305
J13	38.3	591	159	13	12.75	346	258	469	352	715	211	152	352
J13	38.3	591	105	10	11.1111	305	211	410	305	609	199	188	305
J13	38.3	591	63	6	11.6	375	281	481	870	762	199	94	963
J13	38.3	591	96	8	12.8571	258	258	457	258	715	199	152	352
J13	38.3	591	57	6	10.6	281	270	387	281	586	117	176	293
J13	38.3	591	98	9	11.75	287	270	457	281	645	186	94	363
J13	38.3	591	66	7	10.3333	264	270	445	316	680	176	106	340
J13	38.3	591	65	6	11.8	311	281	492	398	762	211	141	375
J13	38.3	591	54	5	11.75	258	258	504	258	750	246	164	352
J13	38.3	591	67	6	12.2	275	270	481	363	762	211	164	363
J13	38.3	591	111	10	11.7778	270	270	434	270	680	164	176	340
J13	38.3	591	140	12	12.0909	334	258	504	340	820	246	164	363
J13	38.3	591	112	11	10.7	305	234	445	305	680	211	106	328
J13	38.3	591	137	12	11.9091	270	246	457	270	727	211	94	352
J13	38.3	591	164	14	12.1538	264	258	445	270	703	188	47	340
J13	38.3	591	162	14	12	293	270	422	293	645	152	117	316
J13	38.3	591	155	15	10.7143	281	270	388	281	539	117	176	293
J13	38.3	591	301	24	12.7826	352	246	422	352	633	176	82	328
J13	39.9	601	53	5	12	211	164	398	12	598	234	12	281
J13	39.9	601	103	9	12.125	328	152	398	328	609	246	0	258
J13	39.9	601	113	8	15.2857	345	94	410	12	621	316	12	328
J13	39.9	601	108	10	11.4444	381	199	387	387	563	188	12	293
J13	39.9	601	104	9	12.375	340	176	375	0	551	199	0	281
J13	39.9	601	65	6	11.8	422	117	434	422	645	316	0	340
J13	39.9	601	87	8	11.5714	334	59	410	0	263	352	0	316
J13	39.9	601	95	8	12.4286	322	223	422	340	574	199	0	340
J13	39.9	601	87	8	11.7143	346	23	316	35	527	293	0	152
J13	39.9	601	60	6	11.6	393	117	387	587	375	527	12	293
J13	39.9	601	78	8	10.5714	387	48	387	387	645	340	0	293
J13	39.9	601	108	9	12.75	322	199	410	410	598	211	35	328
J13	39.9	601	158	13	12.6667	322	176	410	246	586	234	23	316
J13	39.9	601	118	10	12.4444	340	270	410	375	563	141	35	328
J13	39.9	601	119	11	11.3	369	234	387	375	562	152	35	363
J13	39.9	601	108	9	12.625	352	82	410	35	645	328	23	293
J13	39.9	601	95	8	12.5714	380	234	434	387	609	199	70	363
J13	39.9	601	106	9	12.625	387	281	410	387	551	129	176	375
J13	39.9	601	95	9	11.25	393	258	398	398	574	141	47	352
J13	39.9	601	62	6	11.4	293	211	422	293	609	211	23	305
J13	40.1	1012	112	10	11.7778	346	246	445	340	703	199	23	352
J13	40.1	1012	160	17	9.5625	357	293	445	363	598	152	152	363
J13	40.1	1012	134	15	9.35714	398	305	481	398	633	176	94	398
J13	40.1	1012	142	16	9	298	270	457	270	645	188	129	352
J13	40.1	1012	115	11	11	346	223	446	352	621	223	23	352
J13	40.1	1012	106	10	11.2222	363	316	481	363	668	164	188	375
J13	40.1	1012	101	14	7.38462	305	305	481	305	680	176	12	352
J13	40.1	1012	125	14	9.23077	299	293	492	293	680	199	176	375
J13	40.1	1012	109	12	9.45455	393	316	527	398	727	211	188	398
J13	40.1	1012	99	11	9.4	352	281	469	352	715	188	176	352
J13	40.1	1012	118	16	7.46667	375	305	457	316	691	152	152	363
J13	40.1	1012	158	15	10.7857	363	293	457	363	680	164	176	363
J13	40.1	1012	145	15	9.92857	369	305	481	363	680	176	164	363
J13	40.1	1012	92	7	14.3333	393	258	492	398	820	234	35	387
J13	40.1	1012	139	14	10.1538	375	293	492	375	820	199	164	375
J13	40.1	1012	143	13	11.3333	410	316	504	410	844	188	164	410
J13	40.1	1012	159			398	293	504	398	2285	210	164	398
J13	40.1	1012	122			380	223	469	422	715	246	188	352
J13	40.1	1012	132			334	281	481	387	680	199	129	375
J13	40.1	1012	128			305	246	445	363	621	199	141	363
J13	44.8	950	173	14	12.8462	422	340	504	422	668	164	176	422
J13	44.8	950	146	13	11.75	428	340	516	340	680	176	35	434
J13	44.8	950	160	14	12	357	340	516	457	645	176	176	434
J13	44.8	950	154	14	11.3846	363	340	516	363	656	176	188	422
J13	44.8	950	96	9	11.25	445	352	527	445	668	176	164	445
J13	44.8	950	118	11	11.2	381	328	492	375	668	164	188	398
J13	44.8	950	176	14	13.0769	481	328	516	481	691	188	152	422
J13	44.8	950	158	15	10.8571	375	352	527	445	668	176	188	434
J13	44.8	950	131	12	11.3636	375	328	516	516	680	188	176	422
J13	44.8	950	133	12	11.5455	381	328	504	410	668	176	188	410
J13	44.8	950	115	9	13.625	393	340	574	387	809	234	164	445
J13	44.8	950	29	2	17	404	340	609	129	1171	270	94	469
J13	44.8	950	245	19	13.2778	398	316	527	398	703	211	164	422
J13	44.8	950	160	14	11.7692	440	316	527	445	691	211	152	422
J13	44.8	950	134	15	9.21429	398	293	481	398	633	188	176	387
J13	44.8	950	177	15	12.1429	428	305	504	422	691	199	164	410
J13	44.8	950	118	12	10.2727	340	340	516	340	691	176	164	422
J13	44.8	950	134	15	9.21429	340	305	492	340	645	188	176	375
J13	44.8	950	128	13	10.25	346	36	516	410	691	199	94	410
J13	44.8	950	149	14	11	416	234	492	410	691	258	12	375
J13	44.8	950	130	13	10.4167	451	305	516	398	680	211	152	410
J13	45.0	954	181	15	12.5714	328	164	398	23	563	234	12	293
J13	45.0	954	169	13	13.6667	328	223	410	328	586	188	23	328
J13	45.0	954	130	11	12.4	369	188	527	375	2941	340	12	375
J13	45.0	954	66	6	11.8	393	223	481	481	656	258	23	387
J13	45.0	954	177	14	13.1538	410	188	410	410	563	223	23	328
J13	45.0	954	99	8	13.4286	322	246	422	328	574	176	23	328
J13	45.0	954	86	9	10.125	340	246	422	340	527	176	23	340
J13	45.0	954	112	12	9.63636	363	234	387	457	492	152	35	328
J13	45.0	954	112	11	10.7	363	281	410	63	563	129	129	352
J13	45.0	954	112	7	11.6667	299	223	398	305	563	176	70	305
J13	45.0	954	86	9	9.5	363	199	363	363	527	164	23	258
J13	45.0	954				305	223	375	293	504	152	70	281
J13	45.0	954				287	223	352	223	481	129	94	281
J13	45.0	954	92	10	9.77778	287	199	375	293	492	176	106	293
J13	45.0	954				352	270	469	352	1019	199	70	352
J13	45.0	954	176			328	246	398	328	527	152	59	316
J13	45.0	954	90	10	9.33333	316	199	316	316	434	117	12	305
J13	45.8	962	53	5	11.75	340	141	445	340	656	305	12	363
J13	45.8	962	145	12	12.6364	410	164	410	410	539	246	12	316
J13	45.8	962	123	12	10.8182	375	281	387	375	492	106	23	375
J13	45.8	962	73	8	9.71429	375	211	422	316	539	211	23	328
J13	45.8	962	42	4	12	393	293	422	398	563	129	23	387
J13	45.8	962	119	12	10.3636	416	293	410	410	621	117	106	375
J13	45.8	962	125	13	10	357	12	375	12	469	363	0	270
J13	45.8	962	166	15	11.4286	381	35	387	23	481	352	12	270
J13	45.8	962	113	9	13.375	316	246	422	316	539	176	23	340
J13	45.8	962	106	11	10.1	369	258	387	363	492	129	35	363
J13	45.8	962	172	13	13.8333	322	223	398	316	481	176	23	316
J13	45.8	962	114	13	8.91667	381	258	387	375	492	129	141	352
J13	45.8	962	156	16	10.1333	392	141	387	387	504	246	12	293
J13	45.8	962	19	2	12	346	176	398	23	516	23	23	316
J13	45.8	962	146	15	9.92857	340	258	398	340	481	141	106	328
J13	45.8	962	60	5	13	380	281	387	375	492	106	129	328
J13	45.8	962	46	4	13	334	234	363	340	469	129	141	328
J13	45.8	962	134			299	23	316	23	422	293	12	188
J13	45.8	962	140	14	10.3077	293	176	363	293	457	188	23	293
J13	45.8	962	127	12	10.9091	375	176	363	375	457	188	23	281
J13	47.2	1064	140	12	12.2727	375	188	434	375	633	246	35	340
J13	47.2	1064	113	11	10.9	387	199	398	387	633	199	94	316
J13	47.2	1064	116	11	11.2	275	199	388	281	633	88	0	293
J13	47.2	1064	123	12	10.6364	287	293	22	16	598	129	94	352
J13	47.2	1064	47	4	13.3333	381	305	598	375	973	293	82	434
J13	47.2	1064	114	11	11	287	281	410	293	598	129	94	352
J13	47.2	1064	152	15	10.5714	299	293	410	305	551	117	152	316
J13	47.2	1064	174	16	11.2667	393	258	422	93	598	164	82	352
J13	47.2	1064	145	14	10.8462	287	270	387	281	551	117	94	316
J13	47.2	1064	95	10	10.2222	305	258	410	305	727	152	70	316
J13	47.2	1064	147	14	10.8462	311	258	434	293	656	176	35	340
J13	47.2	1064	87	9	10.375	322	106	422	328	656	316	12	316
J13	47.2	1064	108	11	10.3	334	234	410	328	563	176	94	328
J13	47.2	1064	105	11	10.1	293	211	398	293	516	188	106	305
J13	47.2	1064	74	7	11.5	304	246	422	305	609	176	94	328
J13	47.2	1064	60	3	21.5	352	270	445	281	656	176	129	352
J13	47.2	1064	70	8	9.14286	363	188	375	117	539	188	117	281
J13	47.2	1064	43	4	12.3333	299	199	398	305	574	199	94	305
J13	47.2	1064	37	2	21	287	199	422	340	621	223	23	316
J13	47.2	1064	58	3	21	328	223	398	328	598	176	106	316
J13	47.4	1219	97	8	13	375	258	410	375	492	152	0	352
J13	47.4	1219	169	15	11.6429	387	211	375	375	492	164	35	293
J13	47.4	1219	242	18	13.8235	404	258	410	316	504	152	23	340
J13	47.4	1219	158	14	11.6923	363	281	387	363	481	106	176	363
J13	47.4	1219	142	12	12.5455	322	281	398	316	504	117	176	328
J13	47.4	1219	70	5	16	305	234	422	305	563	188	23	316
J13	47.4	1219	28	4	16	363	234	410	375	621	176	35	352
J13	47.4	1219	27	3	11	434	281	422	363	539	141	141	363
J13	47.4	1219	78	8	10.2857	357	258	375	270	492	117	82	328
J13	47.4	1219	177	16	11.4	334	246	387	340	516	141	129	328
J13	47.4	1219	83	8	11	398	234	410	398	574	176	70	328
J13	47.4	1219	119	12	10.3636	229	223	422	363	563	199	23	328
J13	47.4	1219	128	13	10.3333	311	223	387	305	504	164	106	305
J13	47.4	1219	200	18	11.4118	211	246	410	211	527	164	59	328
J13	47.4	1219	149	14	11	316	258	410	316	551	152	94	316
J13	47.4	1219	78	9	9.375	299	246	387	293	469	141	117	305
J13	47.4	1219	75	8	9.85714	299	246	363	305	469	117	188	305
J13	47.4	1219	110	12	9.54545	299	223	387	305	469	164	106	305
J13	47.4	1219	131	14	9.69231	340	246	363	340	445	117	59	316
J13	47.4	1219	80	8	10.7143	328	234	363	281	469	129	94	316
J13	47.9	1070	149	13	12	410	328	504	410	785	176	117	410
J13	47.9	1070	150	13	12	363	316	457	363	621	141	176	363
J13	47.9	1070	162	15	11.2143	381	35	469	375	680	164	106	387
J13	47.9	1070	216	19	11.6667	363	281	457	363	809	176	94	375
J13	47.9	1070	174	17	10.625	387	293	481	387	680	188	106	387
J13	47.9	1070	260	23	11.5455	398	305	469	398	656	164	141	387
J13	47.9	1070	205	18	11.7647	363	305	469	363	691	164	94	387
J13	47.9	1070	175	16	11.3333	352	293	469	352	668	176	94	375
J13	47.9	1070	187	17	11.25	299	293	469	387	633	176	199	387
J13	47.9	1070	158	15	10.8571	299	305	469	305	680	164	117	387
J13	47.9	1070	186	17	11.1875	410	305	469	410	691	164	188	387
J13	47.9	1070	163	14	12.0769	357	316	469	352	691	152	152	375
J13	47.9	1070	161	16	10.4667	404	316	469	410	691	152	117	398
J13	47.9	1070	170	16	11	334	305	469	340	634	164	188	375
J13	47.9	1070	144	14	10.8462	451	316	481	340	856	164	211	387
J13	47.9	1070	175	18	10.0588	396	293	481	363	1266	188	117	375
J13	47.9	1070	163	17	9.875	375	305	492	375	2367	188	188	388
J13	47.9	1070	288	27	10.8846	422	281	492	375	891	211	129	375
J13	47.9	1070	148	17	8.9375	346	246	434	340	621	188	117	340
J13	47.9	1070	175	18	10	369	270	434	363	609	164	106	363
J13	48.7	1190	118	10	12.4444	387	328	551	387	809	223	223	457
J13	48.7	1190	126	11	12	340	340	527	434	773	188	211	434
J13	48.7	1190	143	12	12.4545	451	316	527	375	761	211	223	410
J13	48.7	1190	142	12	12.2727	334	328	504	422	783	176	223	410
J13	48.7	1190	120	12	10.5455	404	305	516	398	2883	188	176	387
J13	48.7	1190	148	12	12.8182	346	328	527	410	785	199	211	410
J13	48.7	1190	159	14	11.8462	328	316	481	328	668	164	188	387
J13	48.7	1190	148	13	11.9167	334	316	492	422	680	176	199	387
J13	48.7	1190	121	10	12.7778	462	328	527	398	785	199	398
J13	48.7	1190	154	14	11.4615	264	328	469	270	668	141	223	387
J13	48.7	1190	120	12	10.4545	322	293	504	363	820	211	117	398
J13	48.7	1190	137	12	11.9091	381	316	492	352	762	176	211	387
J13	48.7	1190	116	12	10	393	293	481	398	691	188	199	398
J13	48.7	1190	215	18	12.2353	357	305	469	363	680	164	223	375
J13	48.7	1190	152	15	10.5	311	305	457	305	633	152	211	387
J13	48.7	1190	110	12	9.72727	422	316	434	328	633	117	199	375
J13	48.7	1190	151	14	11.2308	375	281	481	375	750	199	188	375
J13	48.7	1190	148	13	11.9167	357	281	457	270	645	176	188	363
J13	48.7	1190	111	12	9.63636	457	293	457	457	73	164	188	375
J13	49.7	1262	59	6	10.8	264	258	457	258	770	199	106	352
J13	49.7	1262	154	13	12.4167	170	223	410	352	527	188	152	340
J13	49.7	1262	107	10	11.3333	357	270	445	352	621	176	176	352
J13	49.7	1262	123	11	11.9	340	258	434	340	609	176	129	340
J13	49.7	1262	126	11	12	363	258	445	281	656	188	164	340
J13	49.7	1262	88	8	11.7143	352	246	434	352	598	188	152	352
J13	49.7	1262	46	5	10.5	287	305	770	305	1207	492	164	504
J13	50.8	1262	143	12	12.6364	340	211	398	328	551	188	12	328
J13	50.8	1262	123	11	11.9	328	270	434	352	527	164	12	352
J13	50.8	1262	128	12	11.1818	363	281	422	363	539	141	129	352
J13	50.8	1262	130	12	11.2727	252	188	398	258	492	211	23	316
J13	50.8	1262	111	11	10.6	287	293	398	293	504	106	188	375
J13	50.8	1262	149	13	11.9167	328	258	410	328	504	152	82	328
J13	50.8	1262	147	13	11.8333	334	281	422	340	539	141	94	352
J13	50.8	1262	71	7	11	369	258	398	375	527	141	82	363
J13	50.8	1262	130	12	11.3636	352	234	398	352	527	164	82	352
J13	50.8	1262	143	13	11.4167	357	270	422	352	527	152	82	352
J13	50.8	1262	104	10	11	275	270	387	363	551	117	82	352
J13	50.8	1262	157	14	11.6923	346	281	410	340	539	129	82	352
J13	50.8	1262	153	14	11.3077	275	270	398	270	539	129	176	352
J13	50.8	1262	245	14	10.8462	287	281	398	293	527	117	94	352
J13	50.8	1262	164	15	11.4286	316	246	398	316	516	152	82	316

## Sheet: Random Distress Captivity
Tank	TL (cm)	Weight (g)	Sound Duration (ms)	Nº of pulses	Pulse period (ms)	Dominant frequency (Hz)	Random
J13	35.8	463	133	12	11.7273	270	0.997428
J13	32.9	335	211	20	10.7895	287	0.996609
J13	32.5	324	113	10	12	363	0.992189
J13	39.9	601	78	8	10.5714	387	0.989141
J13	34.5	404	135	14	10	205	0.987994		To assess differences in sound features between contexts (distress and social) and ontogenetic groups (juvenile and adults), 50 sounds per context for each ontogenetic group/context were considered. In these analyses, data concerning distress sounds were restricted to 50 randomly selected sounds from the whole data set (highlighted in yellow) to avoid large imbalances between factor levels sample…
J13	34.5	404	167	16	10.8667	205	0.987915
J13	47.2	1064	123	12	10.6364	287	0.984717
J13	33.1	352	84	8	11.2857	434	0.981557
J13	33.1	352	75	7	11.5	375	0.98113
J13	35.8	463	143	13	11.3333	188	0.975536
J13	33.1	372	73	7	11.1667	258	0.974638
J13	39.9	601	53	5	12	211	0.970985		Note: In order to select 50 andom distress sounds, the Excel RAND() function was used to assign a random number to each row. Then I sorted the random numbers from largest to smallest (Data tab > Sort & Filter group > ZA button). Excel automatically expanded the selection and sort the entire rows in random order.
J13	35.2	400	87	9	10.25	293	0.970437
J13	34.5	404	322	28	8.07407	188	0.969085
J13	44.8	950	128	13	10.25	346	0.962188
J13	31.4	273	83	9	9.75	316	0.960539
J13	44.8	950	130	13	10.4167	451	0.958708
J13	38.3	591	137	12	11.9091	270	0.955045
J13	40.1	1012	101	14	7.38462	305	0.947815
J13	47.4	1219	149	14	11	316	0.947068
J13	45	954	112	11	10.7	363	0.941364
J13	47.4	1219	110	12	9.54545	299	0.940534
J13	49.7	1262	123	11	11.9	340	0.936373
J13	47.2	1064	108	11	10.3	334	0.932821
J13	33.1	372	75	8	10.1429	275	0.929799
J13	34.5	404	202	19	10.8889	193	0.926762
J13	45	954	112	7	11.6667	299	0.914982
J13	40.1	1012	145	15	9.92857	369	0.911551
J13	50.8	1262	143	12	12.6364	340	0.906582
J13	47.2	1064	37	2	21	287	0.905802
J13	48.7	1190	111	12	9.63636	457	0.902459
J13	48.7	1190	143	12	12.4545	451	0.893893
J13	32.9	335	99	10	10.4444	381	0.892629
J13	32.9	335	113	11	10.7	299	0.891227
J13	35.8	463	76	7	11.8333	357	0.89016
J13	44.8	950	118	11	11.2	381	0.886182
J13	35.8	463	74	8	10.1429	304	0.885318
J13	39.9	601	95	9	11.25	393	0.884542
J13	45.8	962	53	5	11.75	340	0.879651
J13	47.4	1219	55	4	16	363	0.878202
J13	35.2	400	169	14	12.6154	357	0.87802
J13	33.1	372	124	13	10	305	0.877249
J13	35.2	400	49	5	11.25	270	0.875875
J13	38.3	591	126	15	8.78571	293	0.873401
J13	33.1	372	69	7	10.8333	264	0.871322
J13	35.8	463	108	10	11.4444	270	0.870705
J13	45.8	962	106	11	10.1	369	0.869414
J13	44.8	950	146	13	11.75	428	0.869354
J13	44.8	950	118	12	10.2727	340	0.869323
J13	38.3	591	63	6	11.6	375	0.867727
J13	48.7	1190	116	12	10	393	0.861913
J13	44.8	950	160	14	12	357	0.861772
J13	33.1	372	119	10	12.6667	188	0.858283
J13	32.9	335	71	8	9.57143	316	0.857441
J13	33.1	372	86	9	10.125	357	0.854574
J13	47.4	1219	74	8	9.85714	299	0.853626
J13	45	954				305	0.847991
J13	31.4	273	58	6	10.6	469	0.847418
J13	35.8	463	96	10	10.3333	404	0.838835
J13	34.5	404	109	11	10.4	299	0.838624
J13	45	954				352	0.837226
J13	32.9	335	78	8	10.4286	188	0.834979
J13	48.7	1190	137	12	11.9091	381	0.834451
J13	45	954	169	13	13.6667	328	0.830003
J13	47.9	1070	175	16	11.3333	352	0.827813
J13	35.8	463	92	9	10.875	281	0.827782
J13	34.5	404	167	13	13.4167	252	0.82184
J13	48.7	1190	151	14	11.2308	375	0.816024
J13	35.2	400	68	7	10.6667	311	0.814114
J13	47.9	1070	288	27	10.8846	422	0.81348
J13	32.9	335	97	10	10.3333	199	0.813439
J13	47.2	1064	74	7	11.5	304	0.800785
J13	47.2	1064	145	14	10.8462	287	0.798837
J13	47.2	1064	140	12	12.2727	375	0.796021
J13	45.8	962	146	15	9.92857	340	0.79159
J13	50.8	1262	71	7	11	369	0.791112
J13	48.7	1190	120	12	10.5455	404	0.788877
J13	34.5	404	202	19	10.9444	182	0.788547
J13	32.5	324	117	12	10.1818	293	0.788202
J13	32.9	335	132	13	10.5833	293	0.784587
J13	44.8	950	149	14	11	416	0.780628
J13	40.1	1012	159			398	0.77868
J13	45.8	962	125	13	10	357	0.778297
J13	35.2	400	185	17	11.3125	293	0.778241
J13	48.7	1190	118	10	12.4444	387	0.773444
J13	45.8	962	123	12	10.8182	375	0.771399
J13	47.2	1064	58	3	21	328	0.771026
J13	45	954	92	10	9.77778	287	0.770483
J13	45	954	176			328	0.769722
J13	45.8	962	46	4	13	334	0.768251
J13	31.4	273	38	4	11	421	0.767226
J13	44.8	950	173	14	12.8462	422	0.764299
J13	45	954	90	10	9.33333	316	0.759686
J13	35.8	463	97	10	10.3333	106	0.751161
J13	45.8	962	42	4	12	393	0.747408
J13	47.2	1064	47	4	13.3333	381	0.74658
J13	35.2	400	38	4	11	369	0.746519
J13	40.1	1012	142	16	9	298	0.745458
J13	34.5	404	132	13	10.5833	205	0.739149
J13	40.1	1012	125	14	9.23077	299	0.736487
J13	45	954				287	0.733758
J13	31.4	273	154	14	11.3846	264	0.731501
J13	35.2	400	73	8	9.85714	346	0.730641
J13	35.2	400	97	9	11.625	316	0.730611
J13	40.1	1012	126			305	0.729542
J13	35.2	400	52	5	11.75	334	0.724315
J13	47.9	1070	150	13	12	363	0.720844
J13	45	954	130	11	12.4	369	0.720345
J13	44.8	950	133	12	11.5455	381	0.717657
J13	40.1	1012	115	11	11	346	0.716415
J13	47.2	1064	43	4	12.3333	299	0.707904
J13	47.2	1064	87	9	10.375	322	0.703768
J13	35.8	463	85	8	11.4286	193	0.69996
J13	39.9	601	87	8	11.7143	346	0.696966
J13	45.8	962	127	12	10.9091	375	0.695647
J13	39.9	601	106	9	12.625	387	0.695328
J13	34.5	404	124	12	10.8182	293	0.694158
J13	47.9	1070	174	18	10	369	0.693885
J13	32.5	324	123	11	11.7	240	0.688413
J13	40.1	1012	118	16	7.46667	375	0.68456
J13	34.5	404	156	14	11.6154	193	0.679134
J13	35.2	400	112	10	11.7778	404	0.678134
J13	47.4	1219	131	14	9.69231	340	0.675303
J13	34.5	404	70	7	11.1667	316	0.674523
J13	38.3	591	54	5	11.75	258	0.672024
J13	47.4	1219	240	18	13.8235	404	0.669195
J13	32.5	324	91	8	12	404	0.6685
J13	47.4	1219	200	18	11.4118	211	0.668025
J13	39.9	601	108	9	12.75	322	0.667351
J13	47.9	1070	175	18	10.0588	396	0.665709
J13	34.5	404	77	7	12	299	0.664728
J13	48.7	1190	148	13	11.9167	334	0.657848
J13	44.8	950	29	2	17	404	0.65774
J13	47.2	1064	174	16	11.2667	393	0.650191
J13	32.5	324	79	8	10.5714	375	0.649544
J13	47.4	1219	142	12	12.5455	322	0.64876
J13	38.3	591	159	13	12.75	346	0.635215
J13	45	954	177	14	13.1538	410	0.628788
J13	31.4	273	45	5	10.5	340	0.626069
J13	47.9	1070	163	14	12.0769	357	0.624252
J13	31.4	273	111	11	10.7	398	0.6231
J13	44.8	950	134	15	9.21429	398	0.616654
J13	50.8	1262	149	13	11.9167	328	0.614497
J13	50.8	1262	104	10	11	275	0.613237
J13	44.8	950	160	14	11.7692	440	0.60855
J13	44.8	950	134	15	9.21429	340	0.604412
J13	35.2	400	147	14	10.9231	293	0.600687
J13	32.5	324	214	17	13	350	0.600411
J13	32.9	335	89	9	10.625	293	0.59757
J13	47.9	1070	186	17	11.1875	410	0.597516
J13	31.4	273	95	9	11.25	281	0.595569
J13	32.9	335	84	9	10	299	0.593763
J13	33.1	352	117	11	11.3	375	0.58221
J13	45	954	99	8	13.4286	322	0.581286
J13	50.8	1262	245	14	10.8462	287	0.576799
J13	32.5	324	79	7	12	416	0.576572
J13	47.2	1064	116	11	11.2	275	0.568269
J13	50.8	1262	143	13	11.4167	357	0.568169
J13	45.8	962	172	13	13.8333	322	0.567217
J13	47.4	1219	83	8	11	398	0.565845
J13	32.5	324	84	8	11.2857	353	0.564444
J13	33.1	352	95	9	11.125	363	0.5633
J13	32.9	335	108	10	11.3333	287	0.561333
J13	38.3	591	98	9	11.75	287	0.558797
J13	47.2	1064	114	11	11	287	0.557078
J13	39.9	601	119	11	11.3	369	0.555453
J13	31.4	273	73	7	11.3333	375	0.555048
J13	33.1	352	111	9	12.875	334	0.55325
J13	35.2	400	123	12	10.6364	281	0.552023
J13	35.8	463	162	14	12.0769	287	0.550039
J13	33.1	352	45	4	13	387	0.549967
J13	47.9	1070	174	17	10.625	387	0.545766
J13	35.8	463	75	8	10.1429	287	0.540749
J13	32.9	335	117	11	11.3	375	0.539841
J13	40.1	1012	139	14	10.1538	375	0.53934
J13	31.4	273	152	14	11.2308	375	0.528403
J13	45.8	962	145	12	12.6364	410	0.521436
J13	35.8	463	90	9	10.625	193	0.520677
J13	45	954	112	12	9.63636	363	0.51552
J13	47.9	1070	216	19	11.6667	363	0.515138
J13	47.9	1070	187	17	11.25	299	0.511066
J13	32.9	335	56	6	10.4	369	0.508073
J13	44.8	950	96	9	11.25	445	0.506087
J13	34.5	404	120	12	10.5455	287	0.505048
J13	32.5	324	86	9	10.25	363	0.503537
J13	47.4	1219	97	8	13	375	0.503316
J13	40.1	1012	160	17	9.5625	357	0.497881
J13	47.4	1219	78	9	9.375	299	0.497502
J13	50.8	1262	130	12	11.2727	252	0.497308
J13	39.9	601	62	6	11.6	393	0.496628
J13	48.7	1190	154	14	11.4615	264	0.49642
J13	35.8	463	100	10	10.5556	299	0.493367
J13	33.1	372	102	10	10.7778	352	0.492929
J13	32.5	324	110	10	11.6667	375	0.491614
J13	48.7	1190	215	18	12.2353	357	0.491057
J13	31.4	273	170	14	12.6923	281	0.486107
J13	50.8	1262	157	14	11.6923	346	0.484601
J13	40.1	1012	158	15	10.7857	363	0.484313
J13	49.7	1262	154	13	12.4167	170	0.482329
J13	50.8	1262	130	12	11.3636	352	0.482235
J13	45.8	962	140	14	10.3077	293	0.481973
J13	47.9	1070	260	23	11.5455	398	0.469919
J13	35.8	463	92	9	10.875	281	0.467857
J13	38.3	591	162	14	12	293	0.463645
J13	31.4	273	156	13	12.4167	363	0.463279
J13	32.5	324	138	13	11.1667	311	0.462455
J13	44.8	950	115	9	13.625	393	0.460731
J13	34.5	404	105	11	10	305	0.457052
J13	47.2	1064	137	13	11	311	0.455098
J13	38.3	591	67	6	12.2	275	0.452443
J13	32.9	335	92	10	9.88889	387	0.451895
J13	39.9	601	113	8	15.2857	345	0.450945
J13	47.2	1064	95	10	10.2222	305	0.445579
J13	47.2	1064	70	8	9.14286	363	0.444912
J13	50.8	1262	128	12	11.1818	363	0.444384
J13	35.8	463	144	13	11.6667	182	0.440373
J13	33.1	372	130	13	10.5	188	0.433003
J13	39.9	601	95	8	12.5714	380	0.430966
J13	40.1	1012	99	11	9.4	352	0.429066
J13	32.5	324	99	9	11.75	352	0.423851
J13	50.8	1262	147	13	11.8333	334	0.423575
J13	31.4	273	128	11	12.1	387	0.419873
J13	33.1	352	112	11	10.7	287	0.415024
J13	33.1	372	21	3	9	287	0.409924
J13	38.3	591	66	7	10.3333	264	0.409013
J13	48.7	1190	121	10	12.7778	462	0.408747
J13	35.2	400	124	12	10.8182	375	0.407223
J13	45.8	962	156	16	10.1333	392	0.406565
J13	32.5	324	96	9	11.125	421	0.405811
J13	47.9	1070	149	13	12	410	0.405145
J13	33.1	352	65	6	11.8	422	0.4049
J13	40.1	1012	92	7	14.3333	393	0.402609
J13	33.1	352	45	3	18.5	428	0.402044
J13	38.3	591	164	14	12.1538	264	0.401483
J13	33.1	352	111	11	10.6	275	0.396903
J13	48.7	1190	120	12	10.4545	322	0.396603
J13	32.9	335	112	11	10.7	305	0.394114
J13	50.8	1262	111	11	10.6	287	0.391174
J13	31.4	273	161	14	11.7692	352	0.391075
J13	47.9	1070	205	18	11.7647	363	0.390373
J13	44.8	950	177	15	12.1429	428	0.386481
J13	33.1	372	15	2	10	299	0.38528
J13	35.8	463	117	10	12.3333	264	0.384874
J13	35.8	463	110	11	10.6	393	0.38351
J13	47.4	1219	75	4	21.3333	305	0.375848
J13	35.2	400	196	18	11.1176	328	0.372385
J13	47.4	1219	119	12	10.3636	229	0.371239
J13	32.9	335	62	6	11.2	269	0.367867
J13	33.1	352	132	12	11.5455	275	0.359022
J13	31.4	273	116	11	11.1	275	0.357891
J13	50.8	1262	153	14	11.3077	275	0.348843
J13	47.9	1070	144	14	10.8462	451	0.346912
J13	33.1	352	63	7	9.83333	387	0.346375
J13	47.4	1219	80	8	10.7143	328	0.345839
J13	49.7	1262	46	5	10.5	287	0.344403
J13	47.2	1064	152	15	10.5714	299	0.343897
J13	33.1	352	75	7	11.6667	369	0.341622
J13	34.5	404	147	13	11.8333	275	0.341596
J13	32.5	324	85	8	11.4286	263	0.334627
J13	33.1	372	15	2	10	398	0.331371
J13	38.3	591	111	10	11.7778	270	0.326522
J13	47.9	1070	161	16	10.4667	404	0.326051
J13	35.2	400	19	2	12	439	0.3241
J13	35.8	463	120	11	11.5	182	0.318875
J13	33.1	372	91	10	9.77778	299	0.316087
J13	34.5	404	107	11	10.3	304	0.315352
J13	35.8	463	85	8	11.5714	182	0.314999
J13	45.8	962	113	13	8.91667	381	0.314722
J13	47.9	1070	148	17	8.9375	346	0.313845
J13	49.7	1262	59	6	10.8	264	0.313349
J13	40.1	1012	134	16	8.73333	398	0.309946
J13	45.8	962	60	5	13	380	0.309032
J13	31.4	273	251	21	12.25	357	0.307155
J13	33.1	372	45	5	10	475	0.304212
J13	45.8	962	113	9	13.375	316	0.302591
J13	33.1	372	56	5	12.75	252	0.301952
J13	33.1	352	103	10	10.8889	287	0.298752
J13	31.4	273	183	17	11.0625	275	0.295406
J13	35.2	400	98	9	11.5	328	0.295142
J13	33.1	372	102	11	9.8	205	0.294734
J13	33.1	372	122	12	10.7273	193	0.289527
J13	38.3	591	140	12	12.0909	334	0.287498
J13	47.9	1070	158	15	10.8571	299	0.284261
J13	32.9	335	111	11	10.5	305	0.284053
J13	32.5	324	110	9	13	410	0.283787
J13	33.1	352	86	8	11.4286	343	0.281738
J13	31.4	273	144	13	11.5	357	0.280279
J13	47.2	1064	105	11	10.1	293	0.277654
J13	39.9	601	95	8	12.4286	322	0.276114
J13	48.7	1190	142	12	12.2727	334	0.27558
J13	47.4	1219	27	3	11	434	0.275058
J13	48.7	1190	159	14	11.8462	328	0.274787
J13	32.5	324	89	8	12.1429	328	0.274079
J13	33.1	372	57	6	10.4	299	0.260305
J13	39.9	601	103	9	12.125	328	0.256977
J13	49.7	1262	126	11	12	363	0.246495
J13	34.5	404	122	12	10.6364	205	0.240623
J13	40.1	1012	122			380	0.236423
J13	40.1	1012	106	10	11.2222	363	0.236237
J13	48.7	1190	110	12	9.72727	422	0.234815
J13	32.5	324	101	10	10.5556	393	0.227155
J13	39.9	601	108	11	10.1	352	0.224697
J13	48.7	1190	126	11	12	340	0.22311
J13	31.4	273	95	9	11.25	369	0.222437
J13	49.7	1262	88	8	11.7143	352	0.220075
J13	40.1	1012	143	13	11.3333	410	0.218779
J13	44.8	950	158	15	10.8571	375	0.21147
J13	50.8	1262	123	11	11.9	328	0.207493
J13	39.9	601	65	6	11.8	422	0.207121
J13	39.9	601	104	9	12.375	340	0.202474
J13	45.8	962	73	8	9.71429	375	0.198978
J13	32.5	324	85	8	11.4286	264	0.198834
J13	38.3	591	155	15	10.7143	281	0.197574
J13	33.1	372	109	11	10.4	281	0.194124
J13	49.7	1262	107	10	11.3333	357	0.192859
J13	35.2	400	152	15	10.5714	287	0.192518
J13	39.9	601	108	10	11.4444	381	0.191473
J13	47.9	1070	163	17	9.875	375	0.188482
J13	39.9	601	118	10	12.4444	340	0.182161
J13	45	954	181	15	12.5714	328	0.182038
J13	44.8	950	245	19	13.2778	398	0.17814
J13	33.1	372	85	8	11.2857	293	0.176137
J13	45	954	112	9	9.5	363	0.175058
J13	50.8	1262	164	15	11.4286	316	0.169798
J13	47.9	1070	170	16	11	334	0.165758
J13	38.3	591	105	10	11.1111	305	0.158252
J13	35.2	400	51	4	13.6667	275	0.15608
J13	38.3	591	67	7	10.5	293	0.153048
J13	32.9	335	94	9	11.125	199	0.149579
J13	47.2	1064	60	3	21.5	352	0.147462
J13	38.3	591	57	6	10.6	281	0.144683
J13	32.9	335	96	9	11.125	275	0.141936
J13	47.4	1219	146	14	10.7692	363	0.139086
J13	33.1	372	59	6	10.8	275	0.136352
J13	32.9	335	143	14	10.3846	205	0.135672
J13	39.9	601	87	8	11.5714	334	0.135396
J13	33.1	352	100	9	11.75	346	0.113928
J13	34.5	404	86	9	10.25	316	0.110856
J13	39.9	601	158	13	12.6667	322	0.110575
J13	38.3	591	301	24	12.7826	352	0.110461
J13	34.5	404	102	11	9.9	211	0.107718
J13	35.2	400	162	13	12.9167	252	0.104649
J13	40.1	1012	112	10	11.7778	346	0.104002
J13	33.1	352	111	10	11.5556	381	0.0998834
J13	47.4	1219	128	13	10.3333	311	0.0961221
J13	32.5	324	85	9	10.125	293	0.0921794
J13	44.8	950	131	12	11.3636	375	0.0913148
J13	39.9	601	62	6	11.4	293	0.0814762
J13	31.4	273	136	12	11.7273	345	0.0790908
J13	35.8	463	47	4	13.3333	316	0.0780974
J13	44.8	950	154	14	11.3846	363	0.0743253
J13	48.7	1190	148	13	11.9167	357	0.0742123
J13	32.9	335	129	13	10.4167	275	0.0688222
J13	32.9	335	61	6	11	398	0.0668222
J13	38.3	591	112	11	10.7	305	0.0665732
J13	38.3	591	96	8	12.8571	258	0.0665179
J13	47.4	1219	78	8	10.2857	357	0.061795
J13	47.9	1070	162	15	11.2143	381	0.0614479
J13	48.7	1190	152	15	10.5	311	0.0596846
J13	31.4	273	123	11	11.8	275	0.0588421
J13	47.2	1064	113	11	10.9	387	0.0585546
J13	33.1	352	79	7	12.1667	340	0.0570527
J13	47.4	1219	169	15	11.6429	387	0.0530735
J13	31.4	273	183	17	11	275	0.0454861
J13	48.7	1190	148	12	12.8182	346	0.0437943
J13	33.1	352	120	11	11.5	364	0.0434192
J13	45	954	66	6	11.8	393	0.0429032
J13	45.8	962	19	2	12	346	0.0371009
J13	40.1	1012	109	12	9.45455	393	0.0349154
J13	38.3	591	65	6	11.8	311	0.0335748
J13	34.5	404	209	20	10.7895	193	0.0316834
J13	45.8	962	166	15	11.4286	381	0.0291869
J13	45	954	86	9	10.125	340	0.0246318
J13	45.8	962	134			299	0.022147
J13	33.1	352	74	7	11.3333	275	0.0158034
J13	45.8	962	119	12	10.3636	416	0.0128965
J13	47.4	1219	175	16	11.4	334	0.0123116
J13	32.5	324	88	8	11.8571	352	0.00959631
J13	35.2	400	31	2	18	328	0.0088588
J13	40.1	1012	132			334	0.00723372
J13	44.8	950	176	14	13.0769	481	0.005975
